# Supplementary material for: Can National Registries Contribute to Predict the Risk of Cancer? The Cancer Risk Assessment Model (CRAM)
Source: MDPI journal article supplement (doi:10.3390/cancers14153823), 2022-08-06
Supplement: s1 [file s1]

**Table S1: List of GP's procedures and measurements and selected specialists**

|                                                                                                                                                                                                                                                                                                                                                                                                                                                                                                                                                          |
|----------------------------------------------------------------------------------------------------------------------------------------------------------------------------------------------------------------------------------------------------------------------------------------------------------------------------------------------------------------------------------------------------------------------------------------------------------------------------------------------------------------------------------------------------------|
| <b>GP's procedures and measurements</b> <ul style="list-style-type: none"><li>• Consultation</li><li>• Telephone consultation</li><li>• E-mail consultation</li><li>• Blood sample</li><li>• Biological material</li><li>• Urine dipstick analysis</li><li>• Point-of-care Leukocyte/differential count</li><li>• Point-of-care C-reactive protein test</li><li>• Point-of-care Erythrocyte sedimentation rate</li><li>• Point-of-care haemoglobin</li><li>• Spirometry</li><li>• Spirometry with reversibility</li><li>• Peakflow measurement</li></ul> |
| <b>Selected specialists</b> <ul style="list-style-type: none"><li>• Radiology</li><li>• Dermatology</li><li>• Rheumatology</li><li>• Gynaecological-obstetrical</li><li>• Internal medicine</li><li>• Surgery</li><li>• Neurosurgery</li><li>• Neurology</li><li>• Ophthalmologist</li><li>• Otorhinolaryngology</li><li>• Orthopaedic surgery</li><li>• Plastic surgery</li><li>• Psychiatry</li><li>• Paediatrics</li><li>• Paediatric psychiatry</li><li>• Tropical medicine</li></ul>                                                                |

**Table S2** Coding details on marital status, ethnicity, country of origin, income, educational and occupational status, and comorbidity

- Marital status was categorised into “married/living with someone”, “living alone”.
- Ethnicity was categorised into “Danish”, “immigrant”, “descendant”, and “unknown”.
- Country of origin was categorised into “western countries“, “not-western countries”, and “unknown or missing”
- Income was categorised into “low”, “medium”, “high”
- Occupational status was categorised into “employed”, “unemployed or on welfare payment”, “education”, “early retirement”, “retirement pension”, and “unknown or missing”.

Persons were categorised as living with someone if more than one person aged 18 years or above were living in the same household.

Income and occupational status data were extracted from the Income Statistics Register. We used disposable income after tax payment year 2016. Income was categorised into tertiles, stratified by age groups with five years intervals, which divided an ordered distribution into three parts each containing a third of the population per five years age groups.

Education level was extracted from the Danish Education Register. We used data on highest completed education in year 2017. Level of education was categorised according to ISCED 2011 (UNESCO. International Standard Classification of Education (ISCED) as “low” (ISCED 0-2), “medium” (ISCED 3-4), or “high” education (ISCED 5-8).

Quan’s updated version of the Charlson comorbidity index (CCI) was used to quantify burden of disease classifying comorbid conditions among the respondents (21). We used ICD-10 codes (primary or secondary diagnosis) from NPR for contacts in the period 2007 to 2016, to calculate CCI.

**Table S3: Model B; Predictive risk factors including socioeconomics in the development cohort with cancer as outcome: women**

| Variables                                                         | OR (95% CI)         | P-value |
|-------------------------------------------------------------------|---------------------|---------|
| <b>Age categories</b>                                             |                     |         |
| Age 20-29                                                         | Ref                 |         |
| Age 30-34                                                         | 2.17 (1.67-2.83)    | <0.001  |
| Age 35-39                                                         | 3.00 (2.36-3.83)    | <0.001  |
| Age 40-44                                                         | 4.61 (3.71-5.75)    | <0.001  |
| Age 45-49                                                         | 6.74 (5.47-8.31)    | <0.001  |
| Age 50-54                                                         | 9.07 (7.41-11.10)   | <0.001  |
| Age 55-59                                                         | 12.43 (10.18-15.18) | <0.001  |
| Age 60-64                                                         | 15.90 (13.02-19.41) | <0.001  |
| Age 65-69                                                         | 18.28 (14.61-22.88) | <0.001  |
| Age 70-74                                                         | 19.84 (15.70-25.08) | <0.001  |
| Age 75-79                                                         | 21.52 (16.95-27.31) | <0.001  |
| Age 80-84                                                         | 24.61 (19.32-31.36) | <0.001  |
| Age 85-89                                                         | 19.53 (15.15-25.19) | <0.001  |
| Age 90-94                                                         | 13.97 (10.42-18.72) | <0.001  |
| Age 95-99                                                         | 9.33 (5.81-14.97)   | <0.001  |
| Age +100                                                          | 9.27 (2.91-29.58)   | <0.001  |
| <b>ICD-10 codes</b>                                               |                     |         |
| C44 (skin cancer, other type)                                     | 1.48 (1.29-1.69)    | <0.001  |
| D05 (Carcinoma in situ of breast)                                 | 2.04 (1.52-2.73)    | <0.001  |
| D12 (Benign neoplasm of colon, rectum, anus and anal canal )      | 1.30 (1.16-1.45)    | <0.001  |
| D22 (Melanocytic naevi )                                          | 1.51 (1.16-1.96)    | 0.002   |
| D24 (Benign neoplasm of breast)                                   | 1.36 (1.13-1.65)    | 0.001   |
| D25 (Leiomyoma of uterus )                                        | 1.26 (1.07-1.49)    | 0.006   |
| E04 (Other nontoxic goitre)                                       | 1.29 (1.12-1.48)    | <0.001  |
| E64 (Sequelae of malnutrition and other nutritional deficiencies) | 1.77 (1.18-2.67)    | 0.006   |
| F03 (Unspecified dementia)                                        | 0.47 (0.31-0.72)    | <0.001  |
| G30 (Alzheimer disease)                                           | 0.38 (0.22-0.68)    | 0.001   |
| G40 (Epilepsy)                                                    | 1.32 (1.07-1.62)    | 0.009   |
| I73 (Other peripheral vascular diseases)                          | 1.35 (1.17-1.57)    | <0.001  |
| J44 (Other chronic obstructive pulmonary disease)                 | 1.41 (1.28-1.56)    | <0.001  |
| J90 (Pleural effusion, not elsewhere classified)                  | 1.66 (1.17-2.36)    | 0.004   |
| K13 (Other diseases of lip and oral mucosa)                       | 1.70 (1.22-2.37)    | 0.002   |
| K70 (Alcoholic liver disease)                                     | 1.67 (1.19-2.34)    | 0.003   |
| K83 (Other diseases of biliary tract)                             | 1.62 (1.18-2.23)    | 0.003   |
| M15 (Polyarthrosis)                                               | 0.63 (0.47-0.85)    | 0.002   |
| N60 (Benign mammary dysplasia)                                    | 1.40 (1.16-1.69)    | <0.001  |
| O28 (Abnormal findings on antenatal screening of mother)          | 2.06 (1.29-3.29)    | 0.003   |

|                                                     |                                 |        |
|-----------------------------------------------------|---------------------------------|--------|
| R00 (Abnormalities of heart beat)                   | 1.24 (1.06-1.46)                | 0.009  |
| T26 (Burn and corrosion confined to eye and adnexa) | 2.47 (1.45-4.21)                | 0.001  |
| VRK (Perioperativ bleeding (ml))                    | 0.75 (0.61-0.91)                | 0.004  |
| F22 (Persistent delusional disorders)               | 0.32 (0.14-0.71)                | 0.005  |
| <b>ATC codes</b>                                    |                                 |        |
| A06 (drugs for constipation)                        | 0.81 (0.73-0.90)                | <0.001 |
| C08 (calcium channel blockers)                      | 1.08 (1.02-1.14)                | 0.008  |
| L04 (immunosuppressants)                            | 1.20 (1.05-1.37)                | 0.006  |
| M05 (drugs for treatment of bone diseases)          | 0.89 (0.82-0.96)                | 0.002  |
| N02 (analgesics)                                    | 1.07 (1.02-1.13)                | 0.004  |
| N07 (other nervous system drugs)                    | 1.37 (1.24-1.51)                | <0.001 |
| <b>Practicing specialists</b>                       |                                 |        |
| <b>(Year(s) before cancer diagnoses)</b>            |                                 |        |
| Pediatric psychiatry (3 years)                      | 45.18 (6.12-333.68)             | <0.001 |
| Internal medicine (4 years)                         | 0.87 (0.80-0.95)                | 0.002  |
| Plastic-surgery (1 year)                            | 1.24 (1.06-1.45)                | 0.007  |
| Psychiatry (5 years)                                | 0.82 (0.72-0.94)                | 0.004  |
| <b>GP consultations and procedures</b>              |                                 |        |
| <b>(Year(s) before cancer diagnoses)</b>            |                                 |        |
| GP consultation (2 years)                           | 0.99 (0.98-0.99)                | <0.001 |
| GP consultation (1 year)                            | 1.03 (1.02-1.03)                | <0.001 |
| GP e-mail consultation (1 year)                     | 0.99 (0.98-1.00)                | 0.005  |
| GP haemoglobin (6 years)                            | 0.96 (0.93-0.99)                | 0.007  |
| GP haemoglobin (1 year)                             | 1.04 (1.01-1.06)                | 0.002  |
| GP Spirometry (4 years)                             | 1.13 (1.07-1.20)                | <0.001 |
| <b>SES</b>                                          |                                 |        |
| Country, not western                                | 0.66 (0.58-0.76)                | <0.001 |
| Occupation, early retirement                        | 1.19 (1.09-1.30)                | <0.001 |
| Occupation, retirement                              | 1.27 (1.11-1.45)                | 0.001  |
| <b>Constant (baseline odds)</b>                     | 0.0005949 (0.0004939-0.0007166) | <0.001 |

**Table S4 Model B: Predictive risk factors including socioeconomics in the development cohort with cancer as outcome: men**

| Variables                                                                        | OR (95% CI)          | P-values |
|----------------------------------------------------------------------------------|----------------------|----------|
| <b>Age categories</b>                                                            |                      |          |
| Age 20-29                                                                        | Ref                  |          |
| Age 30-34                                                                        | 1.71 (1.21-2.42)     | 0.002    |
| Age 35-39                                                                        | 2.64 (1.94-3.59)     | <0.001   |
| Age 40-44                                                                        | 3.43 (2.58-4.55)     | <0.001   |
| Age 45-49                                                                        | 5.75 (4.44-7.46)     | <0.001   |
| Age 50-54                                                                        | 10.21 (8.00-13.03)   | <0.001   |
| Age 55-59                                                                        | 18.33 (14.44-23.25)  | <0.001   |
| Age 60-64                                                                        | 28.40 (22.43-35.96)  | <0.001   |
| Age 65-69                                                                        | 42.07 (33.32-53.10)  | <0.001   |
| Age 70-74                                                                        | 56.47 (44.75-71.26)  | <0.001   |
| Age 75-79                                                                        | 57.89 (45.72-73.30)  | <0.001   |
| Age 80-84                                                                        | 62.19 (48.87-79.14)  | <0.001   |
| Age 85-89                                                                        | 62.95 (48.89-81.04)  | <0.001   |
| Age 90-94                                                                        | 52.30 (38.66-70.75)  | <0.001   |
| Age 95-99                                                                        | 48.86 (29.02-82.26)  | <0.001   |
| Age +100                                                                         | 74.30 (17.86-309.14) | <0.001   |
| <b>ICD-10 codes</b>                                                              |                      |          |
| B18 (Chronic viral hepatitis)                                                    | 2.23 (1.64-3.02)     | <0.001   |
| D12 (Benign neoplasm of colon, rectum, anus and anal canal )                     | 1.31 (1.20-1.44)     | <0.001   |
| E04 (Other nontoxic goitre)                                                      | 1.47 (1.15-1.87)     | 0.002    |
| F10 (Mental and behavioural disorders due to use of alcohol)                     | 1.46 (1.30-1.64)     | <0.001   |
| F17 (Mental and behavioural disorders due to use of tobacco)                     | 1.34 (1.15-1.57)     | <0.001   |
| I70 (Atherosclerosis)                                                            | 1.27 (1.09-1.47)     | 0.002    |
| K57 (Diverticular disease of intestine)                                          | 0.84 (0.75-0.95)     | 0.004    |
| K70 (Alcoholic liver disease)                                                    | 1.57 (1.23-2.01)     | <0.001   |
| K83 (Other diseases of biliary tract)                                            | 1.78 (1.29-2.46)     | <0.001   |
| R29 (Other symptoms and signs involving the nervous and musculoskeletal systems) | 0.81 (0.70-0.93)     | 0.002    |
| R79 (Other abnormal findings of blood chemistry)                                 | 1.66 (1.45-1.90)     | <0.001   |
| R91 (Abnormal findings on diagnostic imaging of lung)                            | 1.33 (1.16-1.52)     | <0.001   |
| T18 (Foreign body in alimentary tract)                                           | 1.43 (1.09-1.87)     | 0.009    |
| T23 (Burn and corrosion of wrist and hand)                                       | 1.76 (1.19-2.60)     | 0.005    |
| T81 (Complications of procedures, not elsewhere classified)                      | 1.19 (1.04-1.36)     | 0.009    |
| H25 (Senile cataract)                                                            | 1.20 (1.05-1.36)     | 0.006    |
| F00 (Dementia in Alzheimer disease)                                              | 0.39 (0.23-0.68)     | 0.001    |
| <b>ATC codes</b>                                                                 |                      |          |
| A12 (mineral supplements)                                                        | 0.89 (0.82-0.96)     | 0.004    |
| C08 (calcium channel blockers)                                                   | 1.11 (1.05-1.16)     | <0.001   |

|                                                         |                  |        |
|---------------------------------------------------------|------------------|--------|
| J01 (antibacterials for systemic use)                   | 1.07 (1.02-1.13) | 0.007  |
| N07 (other nervous system drugs)                        | 1.18 (1.07-1.30) | 0.001  |
| R01 (nasal preparations)                                | 0.87 (0.81-0.94) | <0.001 |
| R03 (adrenergics, inhalants)                            | 1.11 (1.04-1.19) | 0.001  |
| <b>Practicing specialists</b>                           |                  |        |
| <b>(Year(s) before cancer diagnoses)</b>                |                  |        |
| Dermatologist (3 years)                                 | 1.05 (1.02-1.07) | <0.001 |
| Paediatric psychiatry (8 years)                         | 1.26 (1.08-1.46) | 0.003  |
| Radiology (3 years)                                     | 0.91 (0.85-0.97) | 0.005  |
| Surgery (1 year)                                        | 1.18 (1.07-1.29) | 0.001  |
| <b>GP consultations and procedures</b>                  |                  |        |
| <b>(Year(s) before cancer diagnoses)</b>                |                  |        |
| GP consultation (1 year)                                | 1.01 (1.00-1.01) | 0.006  |
| GP e-mail consultation (1 year)                         | 0.98 (0.97-0.99) | <0.001 |
| GP blood sample (1 year)                                | 1.03 (1.02-1.05) | <0.001 |
| GP Laboratory test (10 years)                           | 1.06 (1.02-1.10) | 0.002  |
| GP C-reactive Protein testing (1 year)                  | 1.03 (1.01-1.06) | 0.002  |
| GP Peakflow (9 years)                                   | 0.78 (0.66-0.94) | 0.008  |
| GP Spirometry (6 years)                                 | 1.10 (1.03-1.17) | 0.004  |
| GP Spirometry (2 years)                                 | 1.09 (1.03-1.16) | 0.004  |
| GP Spirometry (5 years)                                 | 1.20 (1.05-1.38) | 0.010  |
| GP Urine examination (4 years)                          | 0.94 (0.92-0.97) | <0.001 |
| GP Urine examination (1 year)                           | 1.07 (1.04-1.09) | <0.001 |
| Out of hours services, consultation (6 years)           | 0.90 (0.84-0.97) | 0.007  |
| Out of hours services, telephone consultation (2 years) | 0.95 (0.91-0.98) | 0.005  |
| <b>SES</b>                                              |                  |        |
| Countries, western                                      | 0.79 (0.69-0.91) | 0.001  |
| Countries, not-western                                  | 0.60 (0.52-0.69) | <0.001 |
| Income, middle tertile                                  | 0.91 (0.86-0.96) | 0.001  |
| Income, high tertile                                    | 0.86 (0.81-0.91) | <0.001 |
| Occupation, early retirement                            | 1.21 (1.05-1.38) | 0.006  |
| Occupation, retirement                                  | 1.14 (1.04-1.26) | 0.007  |
| <b>Constant (baseline odds)</b>                         | 0.0004114        | <0.001 |
|                                                         | (0.0003266-      |        |
|                                                         | 0.0005182)       |        |

**Table S5:** Diagnostic performance of CRAM prediction models for absolute risk cutoffs of 1% and 5%.

| Sex   | Model   | Cohort      | Cut off | Probability 0          | Probability 1          | Sensitivity | Specificity | PPV    | NPV    |
|-------|---------|-------------|---------|------------------------|------------------------|-------------|-------------|--------|--------|
| Men   | Model A | Validation  | 1%      | 0.0022 (0.0020-0.0023) | 0.0214 (0.0207-0.0221) | 0.7984      | 0.7157      | 0.0214 | 0.9978 |
| Women | Model A | Validation  | 1%      | 0.0036 (0.0035-0.0038) | 0.0164 (0.0158-0.0170) | 0.6618      | 0.6992      | 0.0164 | 0.9964 |
| Men   | Model A | Validation  | 5%      | 0.0076 (0.0074-0.0078) | 0.0375 (0.0305-0.0456) | 0.0236      | 0.9953      | 0.0375 | 0.9924 |
| Women | Model A | Validation  | 5%      | 0.0075 (0.0073-0.0077) | 0.0238 (0.0119-0.0421) | 0.0027      | 0.9992      | 0.0238 | 0.9925 |
| Men   | Model B | Validation  | 1%      | 0.0022 (0.0021-0.0024) | 0.0216 (0.0209-0.0224) | 0.7935      | 0.7206      | 0.0216 | 0.9978 |
| Women | Model B | Validation  | 1%      | 0.0037 (0.0035-0.0039) | 0.0165 (0.0159-0.0171) | 0.6546      | 0.7043      | 0.0165 | 0.9963 |
| Men   | Model B | Validation  | 5%      | 0.0076 (0.0073-0.0078) | 0.0381 (0.0310-0.0462) | 0.0239      | 0.9953      | 0.0381 | 0.9924 |
| Women | Model B | Validation  | 5%      | 0.0075 (0.0073-0.0077) | 0.0227 (0.0110-0.0414) | 0.0025      | 0.9992      | 0.0227 | 0.9925 |
| Men   | Model A | Development | 1%      | 0.0022 (0.0021-0.0023) | 0.0217 (0.0212-0.0222) | 0.8008      | 0.7147      | 0.0217 | 0.9978 |
| Women | Model A | Development | 1%      | 0.0033 (0.0032-0.0035) | 0.0167 (0.0163-0.0172) | 0.6859      | 0.6997      | 0.0167 | 0.9967 |
| Men   | Model A | Development | 5%      | 0.0076 (0.0075-0.0078) | 0.0545 (0.0484-0.0611) | 0.0333      | 0.9954      | 0.0545 | 0.9924 |
| Women | Model A | Development | 5%      | 0.0074 (0.0072-0.0075) | 0.0445 (0.0324-0.0595) | 0.0054      | 0.9991      | 0.0445 | 0.9926 |
| Men   | Model B | Development | 1%      | 0.0022 (0.0021-0.0023) | 0.0220 (0.0215-0.0226) | 0.7972      | 0.7201      | 0.0220 | 0.9978 |
| Women | Model B | Development | 1%      | 0.0033 (0.0032-0.0035) | 0.0169 (0.0165-0.0174) | 0.6826      | 0.7044      | 0.0169 | 0.9967 |
| Men   | Model B | Development | 5%      | 0.0076 (0.0075-0.0078) | 0.0519 (0.0460-0.0584) | 0.0320      | 0.9954      | 0.0519 | 0.9924 |
| Women | Model B | Development | 5%      | 0.0074 (0.0072-0.0075) | 0.0451 (0.0327-0.0605) | 0.0053      | 0.9992      | 0.0451 | 0.9926 |

Model A contains ICD-10 codes, ATC codes, and GP and specialist contacts; Model B contains ICD-10 codes, ATC codes, GP and specialist contacts, and socioeconomic status (civil status, income, education level, occupation, and country of origin); PPV, positive predictive value; NPV, negative predicted value.
